# Supplementary material for: Maternal supplementation with glycerol monolaurate improves the intestinal health of suckling piglets by inhibiting the NF-κB/MAPK pathways and improving oxidative stability
Source: Royal Society of Chemistry journal article supplement (doi:10.1039/d3fo00068k), 2023-01-01
Supplement: d3fo00068k1.pdf [file d3fo00068k1.pdf]

## Supplementary materials

### Tables

**Table S1.** Ingredients of glycerol monolaurate added in feed.

| Ingredients                    | %     |
|--------------------------------|-------|
| $\alpha$ -glycerol monolaurate | 92.21 |
| $\beta$ -glycerol monolaurate  | 1.89  |
| Lauric acid                    | 2.17  |
| Glyceryl 1,3-dilaurate         | 2.98  |
| Triglyceride laurate           | 0.11  |
| Glycerol                       | 0.63  |

**Table S2.** Diet composition and nutrition level of lactating sows (As-fed basis)

| Ingredients                             | %      | Nutritional levels                    | %     |
|-----------------------------------------|--------|---------------------------------------|-------|
| Corn                                    | 34.10  | Digestible energy, MJ/kg <sup>b</sup> | 14.27 |
| Soybean meal                            | 11.00  | Metabolic energy, MJ/kg               | 13.39 |
| Wheat                                   | 12.00  | Dry matter, % <sup>c</sup>            | 87.00 |
| Barley                                  | 8.00   | Crude protein, % <sup>c</sup>         | 17.50 |
| Broken rice                             | 15.00  | Ash, % <sup>c</sup>                   | 5.30  |
| Extruded soybean                        | 5.00   | Crude fiber, % <sup>c</sup>           | 3.96  |
| Fish meal                               | 2.50   | Crude fat, % <sup>c</sup>             | 5.21  |
| Soybean hull                            | 3.00   | Calcium, % <sup>c</sup>               | 0.80  |
| Fermented soybean meal                  | 4.00   | Phosphorus, % <sup>c</sup>            | 0.60  |
| Soybean oil                             | 1.80   | Available phosphorus, % <sup>c</sup>  | 0.41  |
| Dicalcium phosphate                     | 1.20   | Digestible Lys, % <sup>c</sup>        | 0.86  |
| Limestone                               | 0.70   | Digestible Met + Cys, % <sup>c</sup>  | 0.51  |
| Salt                                    | 0.50   | Digestible Thr, % <sup>c</sup>        | 0.60  |
| Vitamin and mineral premix <sup>a</sup> | 1.10   | Digestible Trp, % <sup>c</sup>        | 0.18  |
| Mold inhibitor                          | 0.10   |                                       |       |
| Total                                   | 100.00 |                                       |       |

<sup>a</sup> Vitamin and mineral premix supplied per kilogram of complete diet: 50.0 mg Zn (ZnSO<sub>4</sub>·H<sub>2</sub>O), 80.0 mg Fe (FeSO<sub>4</sub>·H<sub>2</sub>O), 20.0 mg Mn (MnSO<sub>4</sub>·H<sub>2</sub>O), 5.0 mg Cu (CuSO<sub>4</sub>·5H<sub>2</sub>O), 0.14 mg I (CaI<sub>2</sub>O<sub>6</sub>), 0.3 mg Se (Na<sub>2</sub>SeO<sub>3</sub>), 13,000 IU vitamin A, 4000

IU vitamin D<sub>3</sub>, 30 IU vitamin E, 4 mg vitamin K<sub>3</sub>, 4 mg vitamin B<sub>1</sub>, 10 mg vitamin B<sub>2</sub>, 4.8 mg vitamin B<sub>6</sub>, 0.034 mg vitamin B<sub>12</sub>, 40 mg niacin, 20 mg D-pantothenate, 2 .0 mg folic acid, 0.16 mg D-biotin.

<sup>b</sup> Calculated values according to the tables of feed composition and nutritive values.

<sup>c</sup> Analyzed values.

**Table S3.** Kits information used in this experiment.

| Kits                                                 | Product name                                                           | Code No.  | Company                                    |
|------------------------------------------------------|------------------------------------------------------------------------|-----------|--------------------------------------------|
| TNF- $\alpha$                                        | Pig Tumor necrosis factor $\alpha$ (TNF- $\alpha$ ) ELISA kit          | m1002360V | mlbio company (Shanghai, China)            |
| IL-1 $\beta$                                         | Pig Interleukin 1 $\beta$ (IL-1 $\beta$ ) ELISA kit                    | m1002302V | mlbio company (Shanghai, China)            |
| IL-6                                                 | Pig Interleukin 6 (IL-6) ELISA kit                                     | m1002311V | mlbio company (Shanghai, China)            |
| IL-12                                                | Pig Interleukin 12 (IL-12) ELISA kit                                   | m1002421V | mlbio company (Shanghai, China)            |
| T-AOC                                                | Total antioxidant capacity assay kit (ABTS method)                     | A-015-2-1 | Nanjing JianCheng Bioengineering Institute |
| T-SOD                                                | Total Superoxide Dismutase (T-SOD) assay kit<br>(Hydroxylamine method) | A001-1-2  | Nanjing JianCheng Bioengineering Institute |
| GSH-Px                                               | Total Superoxide Dismutase (T-SOD) assay kit<br>(Hydroxylamine method) | A005-1-2  | Nanjing JianCheng Bioengineering Institute |
| GSH                                                  | Reduced glutathione (GSH) assay kit                                    | A006-2-1  | Nanjing JianCheng Bioengineering Institute |
| MDA                                                  | Malondialdehyde (MDA) assay kit (TBA method)                           | A003-1-2  | Nanjing JianCheng Bioengineering Institute |
| Lysis buffer                                         |                                                                        | EZB-RN001 | EZBioscience, USA                          |
| Tissue RNA Purification Kit                          |                                                                        | EZB-RN001 | EZBioscience, USA                          |
| Colour Reverse Transcription Kit (with gDNA Remover) |                                                                        | A0010CGQ  | EZBioscience, USA                          |
| Colour SYBR Green qPCR Master Mix kit                |                                                                        | A0012-R2  | EZBioscience, USA                          |
| RIPA Lysis Buffer                                    |                                                                        | P0013B    | Beyotime, Shanghai, China                  |
| BLOT-QuickBlocker                                    |                                                                        | C006011   | Sangon, Shanghai, China                    |

---

|                                          |           |                                            |
|------------------------------------------|-----------|--------------------------------------------|
| BCA Protein Assay Kit                    | P0012     | Beyotime, Shanghai, China                  |
| ECL Plus chemiluminescence detection kit | P1010-250 | Applygen Technologies Inc., Beijing, China |

---

**Table S4.** Primers used in real-time quantitative PCR.

| Genes          | Accession      | Direction | Sequences (5'-3')          | Size |
|----------------|----------------|-----------|----------------------------|------|
| <i>pBD1</i>    | NM_213838.1    | Forward   | ACCGCCTCCTCCTTGTATTCCTC    | 147  |
|                |                | Reverse   | AGGTGCCGATCTGTTTCATCTTTGG  |      |
| <i>pBD2</i>    | NM_214442.2    | Forward   | ATTAACCTGCTTACGGGTCTTGGC   | 122  |
|                |                | Reverse   | CCACTGTAACAGGTCCCTTCAATCC  |      |
| <i>pBD3</i>    | XM_021074698.1 | Forward   | TCTTCTTGTTCCCTGATGCCTCTTCC | 146  |
|                |                | Reverse   | GCCACTCACAGAACAGCTACCTATC  |      |
| <i>pBD114</i>  | NM_001129973.1 | Forward   | GTACCTTGGTGGATCCTGAACGATG  | 127  |
|                |                | Reverse   | AACGCCCTCTGAATGCAGCATATC   |      |
| <i>pBD129</i>  | NM_001129975.1 | Forward   | AATGATCCGCACACTTGAAGAGGTC  | 137  |
|                |                | Reverse   | TGGTGTTGATGCTGGCGAAAGG     |      |
| <i>MUC1</i>    | XM_021089730.1 | Forward   | TTCTTCGGGCTGTTGCTACT       | 132  |
|                |                | Reverse   | ACTGTCTTGGAAGGCCAGAA       |      |
| <i>MUC3</i>    | NM_010843.1    | Forward   | CTCCATCCGCTTCAGAAAAG       | 139  |
|                |                | Reverse   | ACTACCTGGGGCCTCTGAAT       |      |
| <i>MUC4</i>    | XM_021068274.1 | Forward   | CCTCCCAAGCAGATGTCAAT       | 138  |
|                |                | Reverse   | CTGGGATAAGAATGCCTCCA       |      |
| <i>β-actin</i> | XM_021086047.1 | Forward   | GATCTGGCACCACACCTTCTACAAC  | 107  |

---

Reverse      TCATCTTCTCACGGTTGGCTTTGG

---

pBD, porcine beta-defensin; MUC, Mucin

**Table S5.** Antibody information used in this experiment.

| Antibodies       | Product name                                          | Code No.   | Company                   |
|------------------|-------------------------------------------------------|------------|---------------------------|
| Claudin 1        | Anti-Claudin 1 Antibody                               | ab15098    | Abcam                     |
| Occludin         | Occludin Polyclonal Antibody                          | 27260-1-AP | Proteintech Group         |
| ZO-1             | ZO-1 Polyclonal Antibody                              | 21773-1-AP | Proteintech Group         |
| JNK              | SAPK/JNK Antibody                                     | 9252s      | Cell Signaling Technology |
| p-JNK            | Phospho-SAPK/JNK (Thr183/Tyr185) (81E11) Rabbit mAb   | 4668s      | Cell Signaling Technology |
| NF- $\kappa$ B   | NF-KB P65 Polyclonal Antibody                         | 10745-1-AP | Proteintech Group         |
| p-NF- $\kappa$ B | Phospho-NF- $\kappa$ B p65 (Ser536) (93H1) Rabbit mAb | 3033s      | Cell Signaling Technology |
| Erk              | p44/42 MAPK (Erk1/2) Antibody                         | 9102s      | Cell Signaling Technology |
| p-Erk            | Phospho-p44/42 MAPK (Erk1/2) (Thr202/Tyr204) Antibody | 9101s      | Cell Signaling Technology |
| P38              | P38 MAPK Monoclonal Antibody                          | 66234      | Proteintech Group         |
| p-P38            | Phospho-p38 MAPK (Thr180/Tyr182) (3D7) Rabbit mAb     | 4092s      | Cell Signaling Technology |
| $\beta$ -actin   | Rabbit Anti-beta-Actin antibody                       | bs-0061R   | Bioss                     |
